# Supplementary material for: Human umbilical cord mesenchymal stem cells to treat spinal cord injury in the early chronic phase: study protocol for a prospective, multicenter, randomized, placebo-controlled, single-blinded clinical trial
Source: PubMed Central journal article supplement — Neural Regen Res. 2020 Jan 28;15(8):1532–8. doi: 10.4103/1673-5374.274347 (PMC7059580; doi:10.4103/1673-5374.274347), 2020-01-28

## 附件 4

## 干细胞临床研究项目伦理审查批件

|                       |                                                                                                          |       |              |
|-----------------------|----------------------------------------------------------------------------------------------------------|-------|--------------|
| 中山大学附属第三医院干细胞临床研究机构   |                                                                                                          |       |              |
| 伦理审查批件编号[2019 年份]10 号 |                                                                                                          |       |              |
| 项目名称                  | 蛛网膜下腔注射人脐带间充质干细胞治疗早慢性脊髓损伤的临床研究                                                                           |       |              |
| 申报单位                  | 中山大学附属第三医院                                                                                               |       |              |
| 申报单位负责人               | 戎利民                                                                                                      | 职务/职称 | 院长           |
| 项目类别                  | <input type="checkbox"/> 基础研究 <input checked="" type="checkbox"/> 临床研究 <input type="checkbox"/> 其他 _____ |       |              |
| 申请文书及版本号              | 干细胞临床研究项目备案材料, 研究方案 4.0                                                                                  |       |              |
| 项目来源                  | 中华人民共和国科技部                                                                                               | 预算经费  | 1781 万       |
| 项目负责人                 | 戎利民                                                                                                      | 职务/职称 | 院长           |
| 伦理委员会主任委员             | 杨扬                                                                                                       | 办公室电话 | 020-85252276 |
| 伦理委员会秘书               | 刘畅                                                                                                       | 评审日期  | 2019. 2. 25  |
| 伦理委员会<br>参会人员         | 姓名                                                                                                       | 职务/职称 |              |
|                       | 杨扬                                                                                                       | 教授    |              |
|                       | 彭亮                                                                                                       | 主任医师  |              |
|                       | 陈壮桂                                                                                                      | 主任医师  |              |
|                       | 任杰                                                                                                       | 主任医师  |              |

|  |     |      |
|--|-----|------|
|  | 陈文捷 | 副研究员 |
|  | 朱昌平 | 副处长  |
|  | 陈代东 | 讲师   |
|  | 周旭毓 | 副主任  |
|  | 曹烨  | 主任   |

1. 伦理审查意见

同意  修改后同意  修改后再审  不同意

2. 审批意见和建议

该项目 2018 年 3 月 30 日经我院干细胞临床研究伦理专家委员会审批同意后，现申请者提出变更临床研究方案（修改样本量的计算，减少入组病例数），我院干细胞临床研究伦理专家委员会再次审查该项目认为：修正案未增加本研究的预期风险且未降低受试者的预期收益，项目伦理内容完善、符合规范，研究内容和结果不存在利益冲突。

同意开展此项目，请严格遵循干细胞临床研究伦理专家委员批准的方案和 GCP 原则开展临床研究。

主任委员（签名）：

伦理委员会（盖章）：

批复日期：2019.2.25

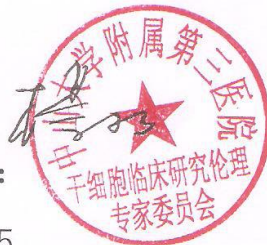

## 上海市东方医院人体细胞临床研究伦理委员会批件

声明：本伦理审查委员会按照 GCP 和《干细胞临床研究管理办法（试行稿）》有关法规组成和工作，其审查和工作过程不受伦理审查委员会以外任何组织及个人影响

批件号：【2018】体临审第(003)号

|                                                                              |                                                                                                                                                                                                                                                      |      |                                                                                                            |                            |                                             |
|------------------------------------------------------------------------------|------------------------------------------------------------------------------------------------------------------------------------------------------------------------------------------------------------------------------------------------------|------|------------------------------------------------------------------------------------------------------------|----------------------------|---------------------------------------------|
| 项目名称                                                                         | 鞘内移植脐带间充质干细胞治疗晚慢性脊髓损伤的临床研究                                                                                                                                                                                                                           |      |                                                                                                            |                            |                                             |
| 类别                                                                           | 人体细胞                                                                                                                                                                                                                                                 | 注册分类 |                                                                                                            | 试验目的                       | 临床研究                                        |
| 专业名称                                                                         | 脊柱专科                                                                                                                                                                                                                                                 |      | 试验项目负责人                                                                                                    | 谭 军                        | 职称<br>主任医师                                  |
|                                                                              |                                                                                                                                                                                                                                                      |      | 专业负责人                                                                                                      |                            | 职称                                          |
| 审<br>评<br>材<br>料                                                             | CFDA 批件： <input type="checkbox"/> 有 <input checked="" type="checkbox"/> 否                                                                                                                                                                            |      |                                                                                                            | 主<br>要<br>参<br>加<br>单<br>位 | 上海市东方医院<br>中山大学附属第三医院<br>四川大学华西医院<br>南方医科大学 |
|                                                                              | 检验报告： <input checked="" type="checkbox"/> 有 <input type="checkbox"/> 否                                                                                                                                                                               |      |                                                                                                            |                            |                                             |
|                                                                              | 试验方案： <input checked="" type="checkbox"/> 有 <input type="checkbox"/> 否                                                                                                                                                                               |      |                                                                                                            |                            |                                             |
|                                                                              | 病例报告表： <input checked="" type="checkbox"/> 有 <input type="checkbox"/> 否                                                                                                                                                                              |      |                                                                                                            |                            |                                             |
|                                                                              | 知情同意书： <input checked="" type="checkbox"/> 有 <input type="checkbox"/> 否                                                                                                                                                                              |      |                                                                                                            |                            |                                             |
|                                                                              | 研究者手册： <input checked="" type="checkbox"/> 有 <input type="checkbox"/> 否                                                                                                                                                                              |      |                                                                                                            |                            |                                             |
|                                                                              | 研究者资格： <input checked="" type="checkbox"/> 符合 <input type="checkbox"/> 不符合                                                                                                                                                                           |      |                                                                                                            |                            |                                             |
| 审查方式： <input checked="" type="checkbox"/> 会议审查 <input type="checkbox"/> 快速审查 |                                                                                                                                                                                                                                                      |      |                                                                                                            |                            |                                             |
| 投<br>票<br>结<br>果                                                             | 会议时间：2018年11月29日，应到人数9人，实到人数8人；其中：投票人数8人，回避0人                                                                                                                                                                                                        |      |                                                                                                            |                            |                                             |
|                                                                              | 会议地点：东方医院南院5楼第二会议室                                                                                                                                                                                                                                   |      |                                                                                                            |                            |                                             |
|                                                                              | 其中：同意0票；作必要的修正后同意8票；作必要的修正后重审0票；不同意0票；<br>暂停或终止已批准的试验0票                                                                                                                                                                                              |      |                                                                                                            |                            |                                             |
|                                                                              | 结论： <input type="checkbox"/> 同意 <input checked="" type="checkbox"/> 作必要修改后同意 <input type="checkbox"/> 作必要的修正后重审 <input type="checkbox"/> 不同意<br><input type="checkbox"/> 暂停或终止已批准的试验                                                                 |      |                                                                                                            |                            |                                             |
| 审<br>评<br>意<br>见                                                             | 是否需要持续审查？ <input checked="" type="checkbox"/> 是 <input type="checkbox"/> 否                                                                                                                                                                           |      | 持续审查频率： <input type="checkbox"/> 3个月 <input checked="" type="checkbox"/> 6个月 <input type="checkbox"/> 12个月 |                            |                                             |
|                                                                              | 审评意见：<br><br>该项目于2018年11月29日进行会议审查，审查结果：作必要的修正后同意。后经快速审查程序，审查结果：同意。递交的研究方案、知情同意书、病例报告表等材料（详见审阅材料清单），符合伦理规范及相关法律法规，同意进行临床研究。<br><br>主任委员（签章）： <br>日期：2018年12月25日 |      |                                                                                                            |                            |                                             |

伦理委员会地址：上海市浦东新区云台路1800号

邮政编码：200123

伦理委员会联系电话：021-38804518-22198



## 上海市东方医院人体细胞临床研究伦理委员会名单

| 姓名  | 性别 | 职称    | 伦理委员会<br>任职 | 单位                                      | 专业    | 签名 |
|-----|----|-------|-------------|-----------------------------------------|-------|----|
| 雷 撼 | 男  | 主任医师  | 主任委员        | 上海市东方医院                                 | 呼吸内科  |    |
| 汤红明 | 男  | 副教授   | 委员          | 上海市东方医院                                 | 医学免疫学 |    |
| 范慧敏 | 男  | 主任医师  | 委员          | 上海市东方医院                                 | 心衰专科  |    |
| 吴文娟 | 女  | 主任技师  | 委员          | 上海市东方医院                                 | 医学检验  |    |
| 翟晓波 | 男  | 主任药师  | 委员          | 上海市东方医院                                 | 临床药学  |    |
| 张震方 | 男  | 律师    | 委员          | 上海市长江律师事务所                              | 律师    |    |
| 马维骏 | 男  | 研究员   | 委员          | 中国科学院上海生命<br>科学研究院/上海交通大学<br>医学院健康科学研究所 | 科研    |    |
| 张宣民 | 男  | 副研究员  | 委员          | 上海浦东新区卫生发展<br>研究院                       | 社会    |    |
| 朱兰芳 | 女  | 助理工程师 | 委员          | 上海市浦东新区陆家嘴<br>街道上港居委会                   | 社会    |    |

## 备注:

- 1、本批件可能在其他中心机构及其伦理审查委员会备案。如对研究在贵机构实施的可行性（包括研究者的资格与经验、设备与条件等）有不同意见，请及时与本伦理审查委员会联系。
- 2、已批准项目须遵循本伦理审查委员会批准的方案执行，须符合 CFDA/GCP 和《赫尔辛基宣言》以及《干细胞临床研究管理办法（试行稿）》的原则。
- 3、暂停/提前终止临床研究，请及时通知本伦理审查委员会。
- 4、本中心发生的严重不良事件及影响研究风险收益比的非预期事件，须及时报告本伦理审查委员会。
- 5、研究过程中，对研究方案和知情同意书等相关文件所作的任何修订，均需得到伦理委员会审查同意后方可实施。
- 6、发现违反方案情况须及时汇报。
- 7、根据伦理审查委员会对持续审查频度的意见，无论试验开始与否，请在持续审查日到期前 1 个月提出持续审查的申请。
- 8、完成临床研究，须提交结题报告供伦理审查委员会审查。
- 9、本批件的有效期为 1 年，逾期未实施的则自动废止。

## 上海市东方医院人体细胞临床研究伦理委员会

## 审阅材料清单

批件号：【2018】体临审第(003)号

|                                                                                                                                                                                                                                                                                                                                                                                                                                                                                                                                                                                                                                                                                                                                                                                                                                                                                                                                                                                                                                                                                                                          |                            |
|--------------------------------------------------------------------------------------------------------------------------------------------------------------------------------------------------------------------------------------------------------------------------------------------------------------------------------------------------------------------------------------------------------------------------------------------------------------------------------------------------------------------------------------------------------------------------------------------------------------------------------------------------------------------------------------------------------------------------------------------------------------------------------------------------------------------------------------------------------------------------------------------------------------------------------------------------------------------------------------------------------------------------------------------------------------------------------------------------------------------------|----------------------------|
| 项目名称                                                                                                                                                                                                                                                                                                                                                                                                                                                                                                                                                                                                                                                                                                                                                                                                                                                                                                                                                                                                                                                                                                                     | 鞘内移植脐带间充质干细胞治疗晚慢性脊髓损伤的临床研究 |
| 申办方                                                                                                                                                                                                                                                                                                                                                                                                                                                                                                                                                                                                                                                                                                                                                                                                                                                                                                                                                                                                                                                                                                                      | 研究者发起                      |
| 合同研究组织                                                                                                                                                                                                                                                                                                                                                                                                                                                                                                                                                                                                                                                                                                                                                                                                                                                                                                                                                                                                                                                                                                                   | 无                          |
| 项目负责人                                                                                                                                                                                                                                                                                                                                                                                                                                                                                                                                                                                                                                                                                                                                                                                                                                                                                                                                                                                                                                                                                                                    | 谭 军                        |
| 审阅材料清单                                                                                                                                                                                                                                                                                                                                                                                                                                                                                                                                                                                                                                                                                                                                                                                                                                                                                                                                                                                                                                                                                                                   |                            |
| <p>初审材料（2018年11月29日会议审查：作必要修正后同意）</p> <ol style="list-style-type: none"> <li>1. 人体细胞临床研究伦理审查申请表</li> <li>2. 干细胞临床研究伦理审查申请表（日期：2018-11-15）</li> <li>3. 干细胞临床研究计划任务书（版本号：V01-180610；版本日期：2018-06-10）</li> <li>4. 学术委员会评审意见</li> <li>5. 临床前研究报告</li> <li>6. 临床研究方案（版本号：V01-180615；版本日期：2018-06-15）</li> <li>7. 知情同意书（版本号：V02-181115；版本日期：2018-11-15）</li> <li>8. 受试者招募材料（版本号：V02-181115；版本日期：2018-11-15）</li> <li>9. 病例报告表（版本号：V01-181115；版本日期：2018-11-15）</li> <li>10. 研究者手册（版本号：V02-181115；版本日期：2018-11-15）</li> <li>11. 主要研究者履历及研究团队名单</li> <li>12. 中心机构伦理委员会批件</li> <li>13. 东方医院干细胞平台资质证明</li> <li>14. 干细胞的来源及获取过程</li> <li>15. 制备过程中不合格及临床试验剩余的干细胞制剂或捐赠物的处理</li> <li>16. 干细胞制剂质检报告</li> <li>17. 购买保险情况说明</li> <li>18. 主要研究者 GCP 证书</li> <li>19. 经费来源说明</li> <li>20. 项目立项申报材料诚信承诺书</li> </ol> <p>复审材料（快速审查：同意）</p> <ol style="list-style-type: none"> <li>1. 干细胞临床研究伦理审查申请表（日期：2018-12-12）</li> <li>2. 干细胞临床研究计划任务书（版本号：V02-181212；版本日期：2018-12-12）</li> <li>3. 临床研究方案（版本号：V02-181212；版本日期：2018-12-12）</li> <li>4. 知情同意书（版本号：V03-181212；版本日期：2018-12-12）</li> <li>5. 受试者招募材料（版本号：V03-181212；版本日期：2018-12-12）</li> </ol> |                            |

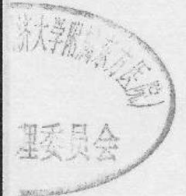

医学伦理委员会

|                                              |  |
|----------------------------------------------|--|
| 6. 病例报告表 (版本号: V02-181212; 版本日期: 2018-12-12) |  |
| 7. 研究者手册 (版本号: V03-181212; 版本日期: 2018-12-12) |  |
| 8. 研究人员名单                                    |  |
| 9. 中英文缩略词表                                   |  |
| 10. 复审申请表                                    |  |
| 11. 修改之处清单                                   |  |



上海市东方医院(同济大学附属东方医院)  
医学伦理委员会



## 四川大学华西医院干细胞临床研究伦理审查通知单

2019年干细胞临床研究审(1)号

|                                                                                                                                                                                                                                                                                                                                                                                                                                                                                                                                                                                                                                                                                                                                                                                                                                                                                                                                                                                                                                                                                                                                                                                                                                                                                                                                                                                                                              |                                                                                                          |
|------------------------------------------------------------------------------------------------------------------------------------------------------------------------------------------------------------------------------------------------------------------------------------------------------------------------------------------------------------------------------------------------------------------------------------------------------------------------------------------------------------------------------------------------------------------------------------------------------------------------------------------------------------------------------------------------------------------------------------------------------------------------------------------------------------------------------------------------------------------------------------------------------------------------------------------------------------------------------------------------------------------------------------------------------------------------------------------------------------------------------------------------------------------------------------------------------------------------------------------------------------------------------------------------------------------------------------------------------------------------------------------------------------------------------|----------------------------------------------------------------------------------------------------------|
| 科室(专业): 骨科                                                                                                                                                                                                                                                                                                                                                                                                                                                                                                                                                                                                                                                                                                                                                                                                                                                                                                                                                                                                                                                                                                                                                                                                                                                                                                                                                                                                                   | 负责人/职称: 刘浩/教授                                                                                            |
| 申报单位: 四川大学华西医院                                                                                                                                                                                                                                                                                                                                                                                                                                                                                                                                                                                                                                                                                                                                                                                                                                                                                                                                                                                                                                                                                                                                                                                                                                                                                                                                                                                                               | 项目类别: <input type="checkbox"/> 基础研究 <input checked="" type="checkbox"/> 临床研究 <input type="checkbox"/> 其他 |
| 项目来源: 国家重点研发计划                                                                                                                                                                                                                                                                                                                                                                                                                                                                                                                                                                                                                                                                                                                                                                                                                                                                                                                                                                                                                                                                                                                                                                                                                                                                                                                                                                                                               | 预算经费(万元): 718                                                                                            |
| 组长单位: 中山大学附属第三医院                                                                                                                                                                                                                                                                                                                                                                                                                                                                                                                                                                                                                                                                                                                                                                                                                                                                                                                                                                                                                                                                                                                                                                                                                                                                                                                                                                                                             |                                                                                                          |
| 研究项目名称: hUC-MSCs 治疗早慢性脊髓损伤的多中心、随机对照临床试验                                                                                                                                                                                                                                                                                                                                                                                                                                                                                                                                                                                                                                                                                                                                                                                                                                                                                                                                                                                                                                                                                                                                                                                                                                                                                                                                                                                      |                                                                                                          |
| 审查方式: <input checked="" type="checkbox"/> 会议审查 <input type="checkbox"/> 快速审查                                                                                                                                                                                                                                                                                                                                                                                                                                                                                                                                                                                                                                                                                                                                                                                                                                                                                                                                                                                                                                                                                                                                                                                                                                                                                                                                                 | 审查日期: 2019-08-06                                                                                         |
| 会议投票情况: 伦理专委会按照国家相关法规要求对送审材料进行审阅和讨论, 会议应到(15)人, 实到(11)人, 参与投票(11)人, 因利益冲突回避(0)人。与该项目利益冲突的委员已申明且未参与该项目的讨论及投票环节。投票结果:<br>1.同意2票; 2.修正后同意9票; 3.修正后重申0票; 4.不同意0票; 5.回避0票; 6.终止或暂停0票                                                                                                                                                                                                                                                                                                                                                                                                                                                                                                                                                                                                                                                                                                                                                                                                                                                                                                                                                                                                                                                                                                                                                                                                                                              |                                                                                                          |
| 审查会议地点: 老八教424会议室                                                                                                                                                                                                                                                                                                                                                                                                                                                                                                                                                                                                                                                                                                                                                                                                                                                                                                                                                                                                                                                                                                                                                                                                                                                                                                                                                                                                            |                                                                                                          |
| <p>审评意见:</p> <ol style="list-style-type: none"> <li>1、研究者资质符合伦理要求。</li> <li>2、请明确干细胞制剂的制备质控标准, 并提供免疫源性、微生物和病毒等相关的记录。</li> <li>3、请补充说明如何保证每批次干细胞制剂的等效性。</li> <li>4、请明确干细胞制剂及与研究相关检查费用均免费, 并明确发生与研究相关的不良反应及严重不良反应时除给予积极免费治疗外, 赔偿费用的支付方。</li> <li>5、在干细胞临床研究项目申请书P8页中, 主要观察指标表述为“ASIA 评分改善大于等于20 分视为具有临床意义”, 而研究方案P12页主要指标表述为“ASIA 评分改善大于等于12 分视为具有临床意义”, P20表述为“ASIA 评分改善大于等于20 分视为具有临床意义”, 另外附件《国家重点研发计划课题任务书》P10确定有效的最低ASIA 评分改善程度<math>\delta = 20</math>, 请明确并统一相关文件表述。</li> <li>6、本研究对照组注射制剂为生理盐水, 使两组试验结果如脑脊液常规、生化等的变化差异可能更倾向于是由于注射的干细胞造成的。请解释对照组不采用与试验组等容量的干细胞保护液的理由。</li> <li>7、在研究方案P19页随访表中, 缺乏一些次要观察指标, 如“Ashworth 肌张力分级”、“血清和脑脊液中炎症因子(TNF-<math>\alpha</math>、TGF-<math>\beta</math>、IL-1<math>\beta</math>、IL-6、iNOS、IL-10等)、神经营养因子(BDNF、GDNF、VEGF和NGF等)及免疫调节因子(CD3+、CD3+ CD4+、CD3+ CD8+、CD3+ CD19+、CD3+ CD16+ CD56+、IgA、IgM、IgG等)”等, 请列出。</li> <li>8、研究方案P7页和临床前研究报告P5表述为“本临床研究针对脊髓损伤后的不同时间段将分三个子课题(早慢性、早慢性、晚慢性)进行”, 请明确子课题名称并请修正相关文件表述。</li> <li>9、在研究方案P36页中, 研究计划进度第一阶段表述为“明确hUC-MSCs 治疗早慢性脊髓损伤的临床效果”, 第三阶段却表述为“制定蛛网膜下腔注射hUC-MSCs治疗亚急性期脊髓损伤的标准临床试验方案”, 请明确本研究的适应症。</li> <li>10、研究方案与知情同意书等文件多次出现“食品药品监督管理局”“国家卫计委”相关描述, 请分别修改为“国家药品监督管理局”和“国家卫生健康委员会”。</li> <li>11、在受试者知情同意书P2页中, 每次随访的采血量计算与研究方案不一致并存在计算错误, 请修正。</li> <li>12、受试者知情同意书P2页和《临床前研究报告》中, “细胞使用量为<math>1 \times 10^6</math> 个/kg/次”系印刷错误, 请修正。知情同意书P6第2行“研究期间”为错别字, 请修订。</li> <li>13、在受试者知情同意书中P2中, “另留取抗凝血 2 ml、非抗凝血 3 ml 入库用于样本保存及后续</li> </ol> |                                                                                                          |

联系方式: 成都市武侯区国学巷 37 号四川大学华西医院老八教 412 秘书: 史小媛电话/传真: 028-85422654

检测（包括血清炎症因子、神经营养因子及免疫调节因子等的统一检测）。”、“血清和脑脊液中炎症因子、神经营养因子及免疫调节因子具体包括：神经营养因子：BDNF、GDNF、VEGF和NGF；炎症相关因子：TNF- $\alpha$ 、TGF- $\beta$ 、IL-1 $\beta$ 、IL-6、iNOS、IL-10；免疫调节：CD3+、CD3+ CD4+、CD3+ CD8+、CD3+ CD19+、CD3+ CD16+ CD56+、IgA、IgM、IgG，”涉及较多血液检测项目，请核实血液标本留取是否足够。

14、受试者知情同意书P7关于“以保证受试过程中能客观评价 hUC-MSCs 治疗亚急性脊髓损伤的临床疗效和安全性。”中，“亚急性”和项目名称中“早慢性”表述不一致，请明确并统一。在受试者知情同意书告知页中“干细胞临床研究”字段重复两次，请修正。

15、受试者知情同意书P5“研究费用”表述为“研究方将在研究结束时对参加本项研究期间所做的与研究有关部分检查费用免费。”请明确研究期间是否需受试者垫付检测费用。

16、在CRF中，请将临床试验流程图与每次访视内容保持一致，如临床试验流程图中未体现随访涉及的“Bohannon等改良的 Ashworth分级”，而随访表中已列出的胸片、一般资料、生命体征、MRI等检查却未在后续随访中体现，请核实并修正，并将页眉处的项目名称与本研究名称保持一致。

17、研究方案规定，在进行相关检查并留取样本后，受试者接受干细胞治疗并记录是否成功完成注射，而CRF表中是先记录干细胞注射情况，再进行各项检查，请核实并统一。

18、CRF表中，仅设计试验组干细胞输注情况记录，请明确对照组是否也需记录输注的时间次数输注容积等信息，且CRF表仅列举了第一次治疗所需的全部项目，未体现随后8次访视检查内容，请补充。流程表中，9次访视都需收集一般资料，但CRF表中仅一页《患者一般情况登记表》，请明确后续随访是否需要重复收集此部分信息，并将流程表中内容与随访内容保持一致。

19、依据《干细胞制剂质量控制及临床前研究指导原则》，在临床前研究方案中，应设计和提出与适应证相关的疾病动物模型，用于预测干细胞在人体内可能的治疗效果、作用机制、不良反应、适宜的输入或植入途径和剂量等临床研究所需的信息，请完善。

20、《干细胞临床研究项目备案材料的补充说明》要求，干细胞制剂临床前研究报告应注明研究机构，临床前研究项目负责人、实验目的、实验方法、数据统计和试验结果等，请完善资料。

21、在研究人员简历中，仅有项目负责人简历，没有课题组其他研究人员简历信息。请补充。

22、《主要原辅料标准》材料应依据《干细胞临床研究项目备案材料的补充说明》的相关要求，提供干细胞制剂制备过程中使用的主要原辅材料，包括培养基、血清、抗生素、活性分子（如不同类型的生长因子、细胞因子等）、抗体等的清单和来源等，请补充。

23、依据干细胞备案材料补充说明的相关要求，申办者需提供制剂处方质量研究以及标准制定资、连续三批工艺稳定性考察材料和所有质量管理及操作SOP 清单，请完善资料。

24、请提供至少三个独立批次干细胞制剂制备的完整制备记录的复印件及委托第三方检验报告。

25、《临床研究进度计划》第一阶段表述为“蛛网膜下腔注射hUC-MSCs”，第三阶段却表述为“鞘内注射hUC -MSCs”，请核实并统一相关材料表述。

26、在研究方案及知情同意书中，请进一步完善受试者入选标准中“外伤所致脊髓损伤”。

27、注射干细胞制剂后，可能存在致瘤性，请在受试者知情同意书“风险防范与救治预案”中，详细告知受试者，并制定相应救治预案。

28、在知情同意书中，请明确研究检测名称及检测次数，请核实研究风险是否已充分告知受试者，请在“受益”条目中补充告知受试者参加研究可能无“直接受益”，并将抽血补贴提高至200元/次。

29、在知情同意书“伤害赔偿”中，伤害赔偿和保险责任主体都是“我们”，请明确“我们”具体指哪个单位。



审查结果：同意      修正后同意      修正后重申      不同意      终止或暂停

#### 伦理专委会对申办方的具体要求

请遵循我国相关法律、法规和规章《干细胞临床研究管理办法（试行）》《干细胞制剂质量控制及临床前研究指导原则（试行）》《药物临床试验伦理审查工作指导原则》《涉及人的生物医学研究伦理审查办法》《药品生产质量管理规范》和 CIOMS《人体生物医学研究国际道德指南》，遵循伦理专委会批准的方案和知情同意书开展临床试验（研究），保护受试者的健康与权利。

请遵循《人类遗传资源管理暂行办法》和《人类遗传资源采集、收集、买卖、出口、出境审批行政许可服务指南》，对我国人类遗传资源（例如生物样本等）及其相关数据信息采集和使用等仅限在我国境内，未经我国相关部门审批，人类遗传资源及其相关数据信息不能出境；若储存的生物样本作其他研究之用，必经四川大学华西医院干细胞临床研究伦理专委会审查同意。

在试验（研究）过程中，若变更主要研究者，对临床研究方案、知情同意书等的任何修改，请申请人提交修正案审查申请。

发生严重不良事件，请申请人及时提交严重不良事件报告；紧急报告之后，尽快提交详细的严重不良事件随访报告。

请递交年度和定期跟踪审查报告；当出现任何可能显著影响试验（研究）进行或增加受试者危险的情况时，请申请人及时向伦理专委会提交书面报告。

试验（研究）纳入了不符合纳入标准或符合排除标准的受试者，符合中止试验（研究）规定而未让受试者退出试验（研究），给予错误治疗或剂量，给予方案禁止的合并用药等没有遵从方案开展研究的情况；或可能对受试者的权益/健康、以及研究的科学性造成不良影响等违背伦理原则与规范的情况，请申办者/监查员/研究者提交违背方案报告。

申请人暂停或提前终止临床试验（研究），请及时提交暂停/终止试验（研究）报告。

完成临床试验（研究），请申请人提交结题报告。

#### 人类遗传资源申报要求

请严格遵循《人类遗传资源管理暂行办法》和《人类遗传资源采集、收集、买卖、出口、出境审批行政许可服务指南》的要求，对于以临床诊疗等为目而使用的人类遗传资源的项目，均应经过四川大学华西医院干细胞临床研究伦理专委会审查同意。伦理立项批准后，应向国家科技部遗传办申请报备，并完成网上注册填报（填报流程可在cd120查询，咨询电话85422851）。

#### 临床研究注册要求

根据国际医学期刊编辑委员会（ICMJE）要求，所有在人体中和采用取自人体的标本进行的临床研究均应注册。请接到伦理批件的研究者务必在临床研究开始前到中国临床研究注册中心注册，请使用我院公共账号(请发邮件到临床研究管理部邮箱hxlcyjglb@163.com申请，联系电话：85422851)登陆以下网址进行临床研究注册：<http://www.chictr.org.cn>，临床研究项目注册成功后产生的唯一注册号请及时发送短信到伦理办公室，是伦理跟踪审查的必查项目。

主任委员（签名）：

四川大学华西医院干细胞临床研究伦理专委会（章）：

日期：2019年08月07

日

# 四川大学华西医院干细胞临床研究伦理专委会

---

附件：

## 伦理审查文件：

1. 干细胞临床研究伦理审查申请表（版本号：3.0/版本日期：2019-06-29）
2. 干细胞临床研究项目申请书（版本号：3.0/版本日期：2019-06-29）
3. 干细胞学术委员会审查意见
4. 干细胞临床研究方案（版本号：3.0/版本日期：2019-06-29）
5. 受试者知情同意书（版本号：3.0/版本日期：2019-06-29）
6. 供者免除知情同意申请表（版本号：1.0/版本日期：2019-06-29）
7. 不合格和剩余干细胞制剂的处理措施
8. 供者筛选标准（版本号：2.0/版本日期：2019-06-29）
9. 病例报告表（版本号：4.0/版本日期：2019-05-19）
10. 关于缺少原始病历的情况说明
11. 临床前研究报告
12. 研究人员简历
13. 参加单位合作意向书
14. 干细胞临床研究质量管理手册
15. 干细胞制备过程中主要原辅料标准
16. 干细胞制剂的制备工艺，质量控制标准和制定依据，以及工艺稳定性数据
17. 干细胞制备的完整记录和干细胞制剂质量检验报告
18. 干细胞制剂的标签、储存、运输和使用追溯方案
19. 临床研究风险预判和处理措施
20. 临床研究进度计划
21. 资料记录与保存措施
22. 关于缺少相关知识产权证明文件和申办者的资质证明的情况说明
23. 伦理审查费缴费发票
24. 关于缺少保险证明的情况说明
25. 2017YFA0105403 任务书
26. 附件 1 中山大学附属第三医院干细胞临床研究伦理专家委员会审查批件
27. 干细胞学术委员会审查意见



## 附件 4

## 干细胞临床研究项目伦理审查批件

|                       |                                                                                                          |       |              |
|-----------------------|----------------------------------------------------------------------------------------------------------|-------|--------------|
| 中山大学附属第二医院干细胞临床研究机构   |                                                                                                          |       |              |
| 伦理审查批件编号[2018 年份]02 号 |                                                                                                          |       |              |
| 项目名称                  | 蛛网膜下腔注射人脐带间充质干细胞治疗早慢性脊髓损伤的临床研究                                                                           |       |              |
| 申报单位                  | 中山大学附属第三医院                                                                                               |       |              |
| 申报单位负责人               | 戎利民                                                                                                      | 职务/职称 | 院长           |
| 项目类别                  | <input type="checkbox"/> 基础研究 <input checked="" type="checkbox"/> 临床研究 <input type="checkbox"/> 其他 _____ |       |              |
| 申请文书及版本号              | 干细胞临床研究项目备案材料                                                                                            |       |              |
| 项目来源                  | 中华人民共和国科技部                                                                                               | 预算经费  | 1781 万       |
| 项目负责人                 | 戎利民                                                                                                      | 职务/职称 | 院长           |
| 伦理委员会主任委员             | 杨扬                                                                                                       | 办公室电话 | 020-85252276 |
| 伦理委员会秘书               | 刘畅                                                                                                       | 评审日期  | 2018.3.30    |
| 伦理委员会<br>参会人员         | 姓名                                                                                                       | 职务/职称 |              |
|                       | 杨扬                                                                                                       | 教授    |              |
|                       | 彭亮                                                                                                       | 主任医师  |              |
|                       | 陈壮桂                                                                                                      | 主任医师  |              |
|                       | 任杰                                                                                                       | 主任医师  |              |

|  |     |      |
|--|-----|------|
|  | 陈文捷 | 副研究员 |
|  | 朱昌平 | 副处长  |
|  | 陈代东 | 讲师   |
|  | 周旭毓 | 副主任  |
|  | 曹焯  | 主任   |

1. 伦理审查意见

同意 修改后同意 修改后再审 不同意

2. 审批意见和建议

该项目 2018 年 3 月 8 日经我院干细胞临床研究伦理专家委员会讨论审批结果为修改后同意，经修改，该项目伦理内容完善、符合规范，充分考虑了安全性和公平性原则，对患者的伤害和风险在可控范围内。患者的选取将基于自愿和知情同意的原则，并将尽最大限度保护患者的权益及隐私，研究内容和结果不存在利益冲突。

同意开展此项目，请严格遵循干细胞临床研究伦理专家委员会批准的方案和 GCP 原则开展临床研究。

主任委员（签名）：

伦理委员会（盖章）：

批复日期：2018.3.30

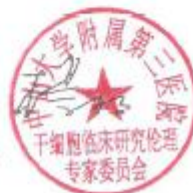

Supplement: NRR-15-1532_Suppl1.pdf [file NRR-15-1532_Suppl1.pdf]
