# Supplementary material for: Human umbilical cord mesenchymal stem cells to treat spinal cord injury in the early chronic phase: study protocol for a prospective, multicenter, randomized, placebo-controlled, single-blinded clinical trial
Source: PubMed Central journal article supplement — Neural Regen Res. 2020 Jan 28;15(8):1532–8. doi: 10.4103/1673-5374.274347 (PMC7059580; doi:10.4103/1673-5374.274347), 2020-01-28
Supplement: NRR-15-1532_Suppl2.pdf [file NRR-15-1532_Suppl2.pdf]

# 受试者知情同意书

方案名称：蛛网膜下腔注射人同种异体脐带间充质干细胞治疗  
早慢性脊髓损伤的临床研究

方案版本号：ZSSYJZWK.GXBZL-JSSS-V6.0-2

知情同意书版本号及日期：ZSSYJZWK.GXBZL-JSSS-V6.0-2  
(2018年10月10日)

主要研究者（负责研究医师）：戎利民、刘斌、杨阳、庞卯、  
张良明、陈宇勇

## 知情同意书·知情告知页

尊敬的受试者：

我们将邀请您参加一项研究，本研究为蛛网膜下腔注射人同种异体脐带间充质干细胞治疗早慢性脊髓损伤的临床研究。本研究的实施方是中山大学附属第三医院（以下简称中山三院）脊柱外科。研究方案已经通过中山三院干细胞临床研究伦理专家委员会审核，同意进行本临床试验。

在您决定是否参加这项研究之前，请仔细阅读以下内容。它可以帮助您了解该项研究以及为何要进行这项研究，研究的程序和期限，参加研究后可能给您带来的益处、风险和不适。如果您愿意，您也可以和您的亲属、朋友一起讨论，或者请医生给予解释，帮助您做出决定。您在充分知情后，同意参加该项研究，请您在本知情同意书的签字页上签字。以下是本项临床研究的介绍。

### 一、研究背景和研究目的：

脊髓损伤（spinal cord injury, SCI）是一种临床常见的严重外伤性中枢神经损伤，目前临床上对于 SCI 的治疗仍是一个世界性难题。如何提高 SCI 的疗效，尽可能恢复肢体的神经功能成为临床治疗 SCI 的关键科学问题。目前临床上对 SCI 的治疗主要包括手术治疗、药物治疗、物理治疗等方法，但这些治疗手段只能使 SCI 患者得到部分临床改善，大多数患者还将面临严重的神经功能障碍。近年来动物实验及临床研究均有报道使用脐带间充质干细胞(umbilical cord mesenchymal stem cells, UC-MSC)移植治疗脊髓损伤，这为 SCI 提供了新的治疗方法，但是其疗效仍存在很大争议，也缺乏高可信度的随机对照临床试验证据的支持。

本研究的主要目的是对早慢性（病程为 2 月-1 年）脊髓损伤患者，开展随机对照临床试验，向蛛网膜下腔注射（鞘注）人同种异体 UC-MSC，研究同种异体 hUC-MSC 鞘注的临床疗效，为早慢性脊髓损伤的治疗提供一种全新的治疗策略。

### 二、细胞来源及制备要求

人同种异体脐带间充质干细胞（hUC-MSC）的制备、生产及使用需获得国家卫计委、食品药品监督管理局等相关机构的批准，生产环境、制备工艺、临床应用要求及其严格。目前全国仅有少数单位获批进行该类研究。中山三院是广

州市干细胞技术临床转化基地和广东省干细胞临床研究与转化示范基地的依托单位，是首批通过国家卫计委备案的干细胞临床研究机构之一，拥有经广东省食品药品检验所认证的 GMP 干细胞层流实验室。

我院生物治疗中心制备的人同种异体脐带间充质干细胞（hUC-MSc）来源于新生儿脐带组织，均经过供者知情同意并通过严格检验、筛选，细胞在临床前研究及小样本临床研究中证实安全耐受性良好、未见明显毒副反应，已用于包括脊髓损伤在内的多种疾病的临床研究。

### 三、入组、排除和剔除标准

#### 入组标准：

- ① 18-65 岁；
- ② 外伤所致脊髓损伤；
- ③ ASIA 脊髓损伤分级 A-D 级；
- ④ 病程 2 月-1 年；
- ⑤ 配合完成随访；

#### 排除标准：

- ① 合并颅脑损伤者；
- ② 非外伤性脊髓损伤，如脊髓肿瘤、脊髓炎、脱髓鞘、脊髓血管畸形等；
- ③ 合并强直性脊柱炎；
- ④ 合并恶性肿瘤；
- ⑤ 合并神经退行性疾病或神经病变；
- ⑥ 合并出血性疾病或凝血功能障碍；
- ⑦ 合并肝肾功能异常；
- ⑧ 活动性或逐渐加重的感染性疾病；
- ⑨ 妊娠或哺乳；
- ⑩ 精神障碍；
- ⑪ 依从性差，或者不能正确理解配合以致不能完成随访者；
- ⑫ 曾接受干细胞注射者；
- ⑬ 正参加其他脊髓损伤相关研究的受试对象；

⑭ 研究者认为不适合入选的其他情况。

**剔除标准：**

- ① 误诊病例；
- ② 虽符合纳入标准而纳入后曾接受干细胞注射者；
- ③ 非规定范围内联合用药，特别是合用对试验结果影响较大的药物，影响有效性和安全性判断者
- ④ 试验期间参加其它临床试验者；
- ⑤ 注射干细胞后无任何可评价记录者。

**四、参与研究方法**

本课题针对早慢性（病程 2 月-1 年）脊髓损伤采用前瞻性随机对照研究。若符合上述入选标准并愿意参加本研究，则会按照遵循对照、随机分组、分组隐匿等原则，随机分配。随机分组的方法为计算机生成随机数列法，给每一个研究对象赋予一个随机数字，并按预设的随机数字代表的分组分配。您有 50% 的概率进入干细胞治疗组，接受常规治疗+脐带间充质干细胞治疗；您也有 50% 的概率进入空白对照组，接受常规治疗。

纳入研究后，进行每月一次的干细胞或常规治疗，治疗方式为蛛网膜下腔穿刺（腰穿），干细胞组的细胞使用量为  $10^6$  个/kg，每次住院时间为 4-5 天，共计 4 个月，每次将于治疗前后留取抗凝血、非抗凝血各一管，约 3ml/管；每次腰椎穿刺后若脑脊液留取顺利，将会留取 2 管，约 5ml/管。治疗疗程结束后的第 1、3、6、12 月返院进行随访，每次留取抗凝血、非抗凝血各一管，约 3ml/管；腰椎穿刺后若脑脊液留取顺利，将会留取 2 管，约 5ml/管。



|  |             |                       |                       |                       |                       |                       |                       |                       |                       |                       |
|--|-------------|-----------------------|-----------------------|-----------------------|-----------------------|-----------------------|-----------------------|-----------------------|-----------------------|-----------------------|
|  | 术前筛查八项      | <input type="radio"/> |                       |                       |                       | <input type="radio"/> |                       |                       | <input type="radio"/> | <input type="radio"/> |
|  | 肿瘤三项        | <input type="radio"/> |                       |                       |                       | <input type="radio"/> |                       |                       | <input type="radio"/> | <input type="radio"/> |
|  | 胸片          | <input type="radio"/> |                       |                       |                       | <input type="radio"/> |                       |                       | <input type="radio"/> | <input type="radio"/> |
|  | 心电图         | <input type="radio"/> |                       |                       |                       | <input type="radio"/> |                       |                       | <input type="radio"/> | <input type="radio"/> |
|  | 记录合并用药      | <input type="radio"/> |
|  | 记录不良事件、不良反应 | <input type="radio"/> |
|  | CRF 负责人审核   | <input type="radio"/> |                       |                       |                       | <input type="radio"/> |                       |                       |                       | <input type="radio"/> |
|  | CRF 监察员审核   | <input type="radio"/> |                       |                       |                       | <input type="radio"/> |                       |                       |                       | <input type="radio"/> |

注：计划外访视：若试验过程中，患者出现不可预料的意外事故，发生死亡、肢体功能残疾、重要器官功能衰竭等严重不良事件，则停止试验，并对患者进行相关检查以及采取相关治疗措施。

## 五、评价指标

主要指标：ASIA 评分、IANR-SCIRFS 量表。

次要指标：Ashworth 肌张力分级、神经电生理、残余尿、MRI/MRI 弥散张量成像等，根据评价指标研究同种异体 hUC-MSC 鞘注的临床疗效，为 hUC-MSC 移植治疗 SCI 提供强有力的循证医学证据。

## 六、风险与不适：

参加本研究可能给您带来的风险如下，您应该和您的研究医生，或者您愿意，与您平日照看您的医生讨论一下这些风险。

研究期间，您可能会发生一些、所有或者不发生这些不良反应：

### 1. 一般情况

您的样本采集将严格按照无菌要求操作，标本的采集可能会有一些非常小的风险，包括短暂的疼痛、局部青紫，少数人会有轻度头晕等症状。

### 2. 治疗时有可能出现下列的不良反应：

- A. 发热反应：发生率约 30%，对症退热治疗（口服洛索洛芬钠 30-60mg，一天 1 次；加强补液：葡萄糖氯化钠注射液 1000ml 静脉滴注），1-3 天可恢复；
- B. 头痛：发生率约 7%，对症镇痛治疗（口服塞来昔布 200mg、一天 1 到 2 次；

加强补液：葡萄糖氯化钠注射液 1000ml 静脉滴注），1-3 天可恢复；

C. 双下肢沉重感：发生率约 6%，加强营养神经治疗（口服甲钴胺 500 $\mu$ g、一天 3 次），1-2 周可恢复；

D. 腹肌痉挛：发生率约 4%，降低肌张力治疗（口服巴氯芬 5mg、一天 3 次），1-2 周可恢复；

E. 疲乏、胸闷、恶心、呕吐、低血压等不适反应：发生率极低，出现上述不良反应时，受试者应消除心理紧张感，同时治疗医师可予以语言安抚后即可缓解；

F. 并发全身或局部感染：如出现穿刺部位感染、菌血症、脓毒血症、中枢神经系统感染等，发生率极低，出现后予以局部清创，静脉滴注及鞘内注射抗生素抗感染治疗；

G. 腰椎穿刺相关并发症（详见腰穿知情同意书）；

H. 进针过深造成脊髓损伤加重或马尾神经、神经根损伤：予以加强营养神经治疗（肌肉注射甲钴胺 1000 $\mu$ g、一天 3 次，静脉滴注单唾液酸四己糖神经节苷脂钠 100mg、一天一次）

I. 受目前医疗水平限制，其他难以预料的意外。

若出现任何不良反应，应立即告知研究医师，以便及时获得相应的医疗处理。

## 七、受益：

**个人受益：**如果您同意参加本研究，您将有可能获得直接的医疗受益，包括神经功能改善，如感觉平面下降、肌张力降低、麻木感减轻，大小便功能改善等。部分患者可在一定程度上消除由脊髓损伤所引发的焦虑、抑郁等心理障碍。

**社会受益：**通过对您的标本进行检测将有助于对疾病作出诊断，可能为脊髓损伤的治疗提供必要的建议，可用于帮助罹患相似病情的其他病人，减轻个人及社会的经济负担。

## 八、有关费用：

如果您入组的是常规治疗组，研究方将支付您参加本项研究期间所做的与研究有关的检查费用，随访时免挂号费，并免费提供检查结果。

如果您入组的是干细胞治疗组，研究方将支付您参加本项研究期间所做的与研究有关的检查费用以及免费提供脐带间充质干细胞，随访时免挂号费，并免费提供检查结果。

若您需要做与本研究无关的其它检查或医疗护理，相关费用需要由您本人承担。

您如果计划怀孕则不应参加该研究，在研究期间应保证不妊娠，如果意外妊娠应立即告知研究医生，并与研究者协商决定是否及时终止妊娠，并立即退出本研究。若您决定继续妊娠，则自行承担由此可能带来的风险。

您在研究期间需要按时到医院随访，做一些检查，这会占用您的一些时间，也可能给您造成麻烦或带来不便。

#### **九、如果参加研究将需要做以下工作：**

- ①提供有关自身病史和当前身体状况的真实情况；
- ②告诉研究医生自己在本次研究期间所出现的任何不适；
- ③不得服用受限制的药物、食物等；
- ④告诉研究医生自己在最近是否曾参与其他研究，或目前正参与其他研究；
- ⑤您如果计划怀孕则不应参加该试验，在试验期间应保证不妊娠，如果意外怀孕应立即告知研究者，并与研究者协商决定是否及时终止妊娠，并立即退出本试验。

#### **十、隐私问题：**

如果您决定参加本项研究，您参加试验及在试验中的个人资料均属保密。您的血/脑脊液标本将以研究编号数字而非您的姓名加以标识。可以识别您身份的信息将不会透露给研究小组以外的成员，除非获得您的许可。所有的研究成员和研究实施方都被要求对您的身份保密。

您的档案将保存在有锁的档案柜中，仅供研究人员查阅。为确保研究按照规定进行，必要时，政府管理部门或伦理审查委员会的成员按规定可以在研究单位查阅您的个人资料。这项研究结果发表时，将不会披露您个人的任何资料。

#### **十一、损害赔偿：**

前期临床研究暂未发现严重不良反应。如发生确因脐带间充质干细胞以及研究方案所需的诊断检查及治疗引起的不良反应，医生会对您提供积极治疗。若发生严重不良反应，并对您造成不可逆伤害的，实施方将依法承担相关的医疗费用及法律规定的其它费用。

#### **十二、怎样获得更多的信息？**



您可以在任何时间提出有关本项研究的任何问题。您的医生将给您留下他/她的咨询方式以便能回答您的问题。在研究过程中，如有任何疑问，请立即提出，您的主管医生将尽力为您解答。如果在研究过程中有任何重要的新信息，可能影响您继续参加研究的意愿时，您的医生将会及时通知您。

### **十三、可以自愿选择参加研究和中途退出研究**

是否参加研究完全取决于您的自愿。您可以拒绝参加本研究，或在研究过程中的任何时间退出本研究，并不会影响对您的医疗或有其他利益的损失。如果您同意参加本研究，在没有特殊原因的情况下，我们真诚地希望您能与我们合作完成该项研究。同时在试验过程中，无论您是否同意，您的主管医生都将有权从您的利益出发，在任何时候中止您继续参加此项研究。

### **十四、现在该做什么？**

是否参加本项研究由您自己决定。您可以和您的家人或者朋友讨论后再做出决定。在您做出参加研究的决定前，您可以向中山大学附属第三医院伦理委员会（电话：020-85253048）、主管医师询问您所关心的问题，请尽可能向你的医生询问有关问题，直至您对本项研究完全理解。

感谢您阅读以上材料。如果您决定参加本项研究，请告诉您的医生，他/她会为您安排一切有关研究的事务。请您保留这份资料。

## 知情同意书·同意签字页

受试者姓名：\_\_\_\_\_ 身份证号码：\_\_\_\_\_

家庭地址：\_\_\_\_\_

### 受试者同意声明：

我已经阅读了上述有关脐带间充质干细胞治疗脊髓损伤临床试验的介绍，已被告知此项研究的目的、背景、过程、风险及获益等情况。我有足够的时间和机会进行提问，问题的答复我很满意。

我知道参加本试验可能产生的风险和受益。我知晓参加试验是自愿的，我确认已有充足时间进行考虑，而且明白：

- 我可以随时向医生咨询更多的信息。
- 我可以随时退出本试验，而不会受到歧视或报复，医疗待遇与受益不会受到影响。
- 如果因患病的需要采取任何其他药物治疗，我应该在事先征求医生的意见，或在事后如实告诉医生。
- 我将获得一份经过签名并注明日期的知情同意书副本，并同意留存一份身份证复印件予此研究单位。
- 最后，我决定同意参加本项试验，并保证尽量遵从医嘱。同时我也同意药品监督管理部门、伦理委员会或申办者代表查阅我的试验资料。

受试者签名：\_\_\_\_\_ 联系方式：\_\_\_\_\_

日期：\_\_\_\_\_年\_\_\_\_\_月\_\_\_\_\_日\_\_\_\_\_时\_\_\_\_\_分

受试者法定代理人签字（必要时）：\_\_\_\_\_

日期：\_\_\_\_\_年\_\_\_\_\_月\_\_\_\_\_日\_\_\_\_\_时\_\_\_\_\_分

与受试者关系：\_\_\_\_\_ 联系方式：\_\_\_\_\_

研究医师签名：\_\_\_\_\_ 联系方式：\_\_\_\_\_

中山三院伦理委员会联系方式：020-85253048

日期：\_\_\_\_\_年\_\_\_\_\_月\_\_\_\_\_日\_\_\_\_\_时\_\_\_\_\_分

# 蛛网膜下腔注射人同种异体脐带间充质干细胞术

## 知情同意书·同意签字页

姓名 \_\_\_\_\_ 性别 \_\_\_\_\_ 年龄 \_\_\_\_\_ 科室 脊柱外科 床号 \_\_\_\_\_ 住院号 \_\_\_\_\_

诊断：脊髓损伤

拟行操作名称：蛛网膜下腔注射人同种异体脐带间充质干细胞术

依照《执业医师法》、《医疗事故处理条例》的有关规定，患者及家属享有知情权，目前无操作禁忌症，已与患者及其家属详谈操作有关的各种问题，如操作的必要性、危险性以及操作可能发生的意外等，我们有相应的措施预防和治疗并发症，但有的病人仍可能发生，主要有如下几点：

- 1) 罕见情况下出现麻药、过敏反应，严重者引起喉头水肿，危及生命；
- 2) 罕见情况下穿刺损伤椎管内血管、神经根及马尾，引起腰腿痛、肢体麻木加重等表现，严重时需手术处理；
- 3) 罕见情况下针道感染、椎管内感染、颅内感染可能；
- 4) 罕见情况下慢性粘连性蛛网膜炎可能；
- 5) 少数病人会出现发热，甚至高热等可能；
- 6) 少见情况下引起头痛、头晕、腰痛等不适；
- 7) 少数病人骨质增生严重，椎间隙极度狭窄，导致腰穿不成功；
- 8) 干细胞注射后，症状无改善或改善不明显以及其他难以预测的并发症。

临床 \_\_\_\_\_ 医生已详细向我说明了蛛网膜下腔注射人同种异体脐带间充质干细胞的应用方法、预期疗效和术中可能出现的情况，患者/监护人/家属表示已知情和同意接受医生告知的操作方式，经过慎重考虑，完全同意该项治疗，并特此声明自愿承担由此治疗方法带来的各种风险和责任。

患者签名： \_\_\_\_\_ 医师签名： \_\_\_\_\_

患者亲属或授权人签名： \_\_\_\_\_ 与患者关系： \_\_\_\_\_

日期： \_\_\_\_\_ 年 \_\_\_\_\_ 月 \_\_\_\_\_ 日 \_\_\_\_\_ 时 \_\_\_\_\_ 分

备注：1、患者有完全行为能力时由患者本人签字；

2、患者为无行为能力人或者限制行为能力人时，由其监护人签字。
